# Supplementary material
Source: Research Square preprint supplement (doi:10.21203/rs.3.rs-9013160/v1)
Supplement: Supplementary file 1 [file 2144887edb2ea02bcd15690d.xlsx]

## Sheet: Hoja1
Table 2. Summary of temporal genomic diversity and demographic parameters for the six populations sampled in both 2008 and 2022. For each population, nucleotide diversity (π), temporal change in nucleotide diversity (Δπ = π2022 − π2008), change in relative differentiation (ΔFst), genome-wide heterozygosity (Het), temporal change in heterozygosity (ΔHet), and effective population size (Nₑ) estimat…
Population	Pi	Pi	Δπ	ΔFst	Het	Het	ΔHet	Ne
	2008	2022	2008-2022	2008-2022	2008	2022	2008-2022	t10	t12	t14
Conil de la frontera	0.00213	0.00159	-0.00054	0.0188	0.279	0.306	0.027	197.38	236.85	276.33
Montero	0.00270	0.00197	-0.00079	0.0190	0.229	0.295	0.066	166.93	200.32	233.71
Lebrija LEB	0.00254	0.00175	-0.00079	~0	0.300	0.297	0.003	196.08	235.29	274.51
Lebrija LEI	0.00256		-0.00081	~0	0.294		-0.003
San Pedro	0.00180	0.00136	-0.00043	~0	0.305	0.290	-0.015	204.56	245.47	286.38
Iro	0.00296	0.00190	-0.00106	0.058	0.180	0.304	0.124	134.24	161.09	187.93
Doñana	0.00251	0.00231	-0.00019	0.0027	0.285	0.291	0.006	129.89	155.87	181.85
