# Supplementary material
Source: Research Square preprint supplement (doi:10.21203/rs.3.rs-9013160/v1)
Supplement: Supplementary file 2 [file 8fd2fe04387e16aa1138feb2.xlsx]

## Sheet: Hoja1
Table 1. Specimens included in this study, with sampling locality, geographic coordinates, sampling year, genetic population, assigned genetic lineage, whole-genome resequencing coverage, internal sequencing code, and NCBI GenBank accession numbers for WGR
Sample ID	Location	Latitude, Longitude	Year	Genetic pop	Genetic Unit	Coverage	Genetic Code	NCBI GenBank Accesion Number WGR
AT29876	Montero /Utrera	37.003535, -5.681730	2008	MON	I	13.3871	P32305_1001_S144	SAMN54692142
AT29877	Montero /Utrera	37.003535, -5.681730	2008	MON	I	9.85151	P32305_1002_S145	SAMN54692143
AT29902	Montero /Utrera	37.003535, -5.681730	2008	MON	I	27.8819	P32305_1003_S146	SAMN54692144
AT29916	Las Cabezas/Lebrija	36.951909, -5.921206	2008	LEB	I	28.229	P32305_1004_S147	SAMN54692145
AT29917	Las Cabezas/Lebrija	36.951909, -5.921206	2008	LEB	I	31.0004	P32305_1005_S148	SAMN54692146
AT29918	Las Cabezas/Lebrija	36.951909, -5.921206	2008	LEB	I	31.6442	P32305_1006_S149	SAMN54692147
AT29921	El Puerco/Lebrija	36.937769, -5.856396	2008	LEI	I	31.7345	P32305_1007_S150	SAMN54692148
AT29926	El Puerco/Lebrija	36.937769, -5.856396	2008	LEI	I	22.5128	P32305_1008_S151	SAMN54692149
AT29931	El Puerco/Lebrija	36.937769, -5.856396	2008	LEI	I	22.8047	P32305_1009_S152	SAMN54692150
AT29936	Las Cañadas/Guadalete/Puerto Real	36.569532, -6.109610	2008	PEZ	III	41.8016	P32305_1010_S153	SAMN54692151
AT29940	Las Cañadas/Guadalete/Puerto Real	36.569532, -6.109610	2008	PEZ	III	21.3429	P32305_1011_S154	SAMN54692152
AT29948	Las Cañadas/Guadalete/Puerto Real	36.569532, -6.109610	2008	PEZ	III	30.6508	P32305_1012_S155	SAMN54692153
AT29955	Arroyo San Pedro/Barrancos Bajos	36.562985, -6.068286	2008	PED	III	8.36147	P32305_1013_S156	SAMN54692154
AT29975	Salinas de Sanlúcar	36.883138, -6.316206	2008	SAL	IV	23.9355	P32305_1016_S159	SAMN54692155
AT29990	Salinas de Sanlúcar	36.883138, -6.316206	2008	SAL	IV	25.5879	P32305_1017_S160	SAMN54692156
AT29993	Salinas de Sanlúcar	36.883138, -6.316206	2008	SAL	IV	22.9725	P32305_1018_S161	SAMN54692157
AT30004	Iro/Puerto Real	36.500914, -6.002993	2008	IRO	II	11.5221	P32305_1019_S162	SAMN54692158
AT30018	Iro/Puerto Real	36.500914, -6.002993	2008	IRO	II	21.7887	P32305_1020_S163	SAMN54692159
AT30020	Iro/Puerto Real	36.500914, -6.002993	2008	IRO	II	9.19663	P32305_1021_S164	SAMN54692160
AT30028	Tarifa	36.028346, -5.611736	2008	VEG	I	14.8491	P32305_1022_S165	SAMN54692161
AT30029	Tarifa	36.028346, -5.611736	2008	VEG	I	34.2382	P32305_1023_S166	SAMN54692162
AT30040	Tarifa	36.028346, -5.611736	2008	VEG	I	24.9062	P32305_1024_S167	SAMN54692163
AT30077	Roche	36.306462, -6.143259	2008	ROM	II	21.553	P32305_1025_S168	SAMN54692164
AT30078	Roche	36.306462, -6.143259	2008	ROM	II	22.6545	P32305_1026_S169	SAMN54692165
AT30063	Roche	36.306462, -6.143259	2008	ROM	II	18.1912	P32305_1027_S170	SAMN54692166
AT30095	Corrales	37.276556, -6.985927	2008	COC	IV	28.2459	P32305_1028_S171	SAMN54692167
AT30101	Corrales	37.276556, -6.985927	2008	COC	IV	26.3216	P32305_1029_S172	SAMN54692168
AT30112	Corrales	37.276556, -6.985927	2008	COC	IV	17.5978	P32305_1030_S173	SAMN54692169
AT30118	Conil	36.286326, -6.054472	2008	COPA	II	19.9056	P32305_1031_S174	SAMN54692170
AT30120	Conil	36.286326, -6.054472	2008	COPA	II	31.2461	P32305_1032_S175	SAMN54692171
AT30122	Conil	36.286326, -6.054472	2008	COPA	II	19.8474	P32305_1033_S176	SAMN54692172
AT30133	Doñana	37.044592, -6.568884	2008	DON	IV	22.9273	P32305_1035_S178	SAMN54692173
AT30134	Doñana	37.044592, -6.568884	2008	DON	IV	21.8062	P32305_1036_S179	SAMN54692174
AT30182	Conil	36.286326, -6.054472	2022	COPA	II	26.9344	P32305_1037_S180	SAMN54692175
AT30184	Conil	36.286326, -6.054472	2022	COPA	II	26.4119	P32305_1038_S181	SAMN54692176
AT30187	Conil	36.286326, -6.054472	2022	COPA	II	21.1136	P32305_1039_S182	SAMN54692177
AT30188	Arroyo San Pedro/Barrancos Bajos	36.569532, -6.109610	2022	PED	III	17.0312	P32305_1040_S183	SAMN54692178
AT30190	Arroyo San Pedro/Barrancos Bajos	36.569532, -6.109610	2022	PED	III	25.9908	P32305_1041_S184	SAMN54692179
AT30191	Arroyo San Pedro/Barrancos Bajos	36.569532, -6.109610	2022	PED	III	15.3227	P32305_1042_S185	SAMN54692180
AT30198	Lebrija	36.951909, -5.921206	2022	LEB	I	19.8016	P32305_1043_S186	SAMN54692181
AT30205	Lebrija	36.951909, -5.921206	2022	LEB	I	28.4719	P32305_1044_S187	SAMN54692182
AT30210	Lebrija	36.951909, -5.921206	2022	LEB	I	23.8626	P32305_1045_S188	SAMN54692183
AT30228	Montero /Utrera	36.977293, -5.695239	2022	MON	I	34.112	P32305_1046_S189	SAMN54692184
AT30229	Montero /Utrera	36.977293, -5.695239	2022	MON	I	24.6134	P32305_1047_S190	SAMN54692185
AT30234	Montero /Utrera	36.977293, -5.695239	2022	MON	I	26.3955	P32305_1048_S191	SAMN54692186
AT30269	Iro/Puerto Real	36.442199, -6.034419	2022	IRO	II	29.9382	P32305_1049_S192	SAMN54692187
AT30271	Iro/Puerto Real	36.442199, -6.034419	2022	IRO	II	26.9263	P32305_1050_S193	SAMN54692188
AT30276	Iro/Puerto Real	36.442199, -6.034419	2022	IRO	II	25.7207	P32305_1051_S194	SAMN54692189
AT30286	Doñana	37.044592, -6.568884	2022	DON	IV	28.5825	P32305_1052_S195	SAMN54692190
AT30293	Doñana	37.044592, -6.568884	2022	DON	IV	25.6888	P32305_1054_S197	SAMN54692191
x	Aphanius iberus - Reference Genome	Captivity	2019	Albuixech, Valencia	x	95	x	GCA_028564705.1
AT29861	Aphanius iberus - Delte del Ebro	41.184302, 1.548151	2021	Delta del Ebro, Catalonia	x	13.8022	CN21596	SAMN51172070
CN21784	Aphanius iberus - Girona North	42.046728, 3.192781	2023	Girona North, Catalonia	x	13.6547	CN21784	SAMN51172063

## Sheet: Hoja2
Migrations	Likelihood Final
12	545.678
11	545.06
10	542.912
9	537.101
8	536.55
7	533.173
6	524.656
5	519.967
4	512.105
3	492.438
2	479.798
1	440.681
Migrations	Likelihood Final
6	162.875
5	162.875
4	162.875
3	162.846
2	162.816
1	162.728
