# Supplementary material
Source: Research Square preprint supplement (doi:10.21203/rs.3.rs-9013160/v1)
Supplement: Supplementary file 3 [file 966f0a614977f22ce4f4ab96.xlsx]

## Sheet: Hoja 1 - baeticus_coma_haplo
Supplementary Table 4. Pairwise absolute nucleotide divergence (Dxy) and relative genetic differentiation (Fst) among populations of Aphanius baeticus for 2008 calculated with pixy, using variant and invariant sites. Each row corresponds to a pairwise population comparison (Var1–Var2), with Dxy representing absolute divergence per site and Fst representing relative differentiation between populat…
Var1	Var2	Dxy	Fst
PEZ	COPA	0.00256069216792415	0.214287154166406
ROM	PEZ	0.00273966865759721	0.194770119651345
PEZ	IRO	0.00278342804402328	0.187757556559746
PEZ	DON	0.00260882341914019	0.182601701438087
PEZ	MON	0.00263535137091931	0.180982140607027
PEZ	COC	0.00243802854139522	0.167658227602166
SAL	PEZ	0.00260008385438697	0.159590142474473
LEB	COPA	0.00273890896141859	0.120637480998843
MON	COPA	0.00272694119382618	0.119849343888347
VEG	COPA	0.00266480862869275	0.118486930051592
LEI	COPA	0.00273375433520478	0.116608429851051
SAL	COPA	0.00269673558875633	0.115420904060574
PEZ	LEB	0.00244901785611392	0.100271242832039
DON	COPA	0.00260593083964334	0.0982710539973434
ROM	LEB	0.00288791442118563	0.09794306860553
VEG	ROM	0.00284047202211126	0.096492292060067
ROM	LEI	0.00291404270668029	0.0947080986036721
SAL	ROM	0.0028650463595204	0.0943188932180328
COPA	COC	0.00243995110227744	0.092665226181431
VEG	PEZ	0.00234152446158908	0.091175810073431
PEZ	LEI	0.0024029969482568	0.0907512952148321
IRO	COC	0.00274767072062493	0.0844856368390785
ROM	MON	0.00289309600858926	0.0842764142272454
SAL	IRO	0.00295218418896214	0.0813078573002754
VEG	COC	0.00255144929200897	0.0802035688073909
LEB	COC	0.00262472194328838	0.0796195829481245
ROM	COC	0.00263278836247283	0.0791711649353352
LEI	COC	0.00261342047427936	0.07784375613902
MON	COC	0.00260777569417905	0.0768200972893609
VEG	DON	0.00271126301282365	0.0728944690093198
LEB	IRO	0.00292575576450558	0.0718437787384455
VEG	SAL	0.00269480939174137	0.071085822330241
LEI	DON	0.00278272151769746	0.0708907854474704
SAL	LEI	0.00276198845767004	0.0692736464669082
ROM	DON	0.00276111964477186	0.0692490825414936
SAL	LEB	0.00273317408387564	0.0691352549112698
LEB	DON	0.00270405251677476	0.0660694411398334
SAL	MON	0.00276269946294528	0.0660006913408243
VEG	IRO	0.00287376349180546	0.0657407213717999
LEI	IRO	0.00295094141427504	0.0619487047116844
MON	LEB	0.0027572266056657	0.0602849572970782
VEG	MON	0.00271949958003324	0.0595294289748567
SAL	COC	0.00253395826789723	0.0591998609258308
MON	DON	0.00273812735436652	0.0574723528382281
IRO	DON	0.00287275304327958	0.0570576052935743
MON	LEI	0.00279082728384426	0.0567036517738543
SAL	DON	0.00266923797769193	0.0547258698236761
IRO	COPA	0.00256815924233591	0.0495649383866039
MON	IRO	0.0029779932194322	0.0485840529398999
ROM	IRO	0.00275281270276085	0.0215627360708648
DON	COC	0.00237910848392258	0.00815863205379562
ROM	COPA	0.00235950283174951	0.00757608891393187
LEI	LEB	0.00259727006427607	0.00530356531681835
VEG	LEB	0.00252952986049214	0.00521365135694431
VEG	LEI	0.00249966594619949	0
