# Supplementary material
Source: Research Square preprint supplement (doi:10.21203/rs.3.rs-9013160/v1)
Supplement: Supplementary file 4 [file f032e334019e1c39d41a01ae.xlsx]

## Sheet: Hoja 1 - baeticus_coma_haplo
Supplementary Table 1. Cytochrome b (MT-CYB) sequences included in the haplotype network analysis. The table lists each sequence, assigned haplotype, genetic lineage, population of origin, internal sample code (AT ID), original GenBank identifier when applicable, accession number (GenBank or this study), NCBI GenBank accession number, and notes on duplicated sequences (yellow cells indicate haplo…
Sample	Haplotype	Linage	Population	ID AT	Original Name (GenBank)	GenBank/this study	Accesion number	Duplicates (yellow indicated discordance on haplotype)
S144	H1	Inland	MON	AT29876	-	2008	SAMN54692142	S153 from Guadalete driange and S144 from Inland lineage
S153	H1	Guadalete drainage	PEZ	AT29936	-	2008	SAMN54692151	KF854449.1 H34
KF854441.1	H2	Inland	MON	AT29903	MON29	GenBank	KF854441.1
KF854440.1	H2	Inland	MON	AT29902	MON28	GenBank	KF854440.1	S146 H2
KF854439.1	H2	Inland	MON	AT29886	MON12	GenBank	KF854439.1
KF854430.1	H2	Inland	LEB	AT29912	LEB7	GenBank	KF854430.1
S145	H2	Inland	MON	AT29877	-	2008	SAMN54692143
S146	H2	Inland	MON	AT29902	-	2008	SAMN54692144	KF854440.1 H2
S191	H2	Inland	MON	AT30234	-	2022	SAMN54692186
KF854424.1	H3	Inland	LEB	AT29905	LEB1	GenBank	KF854424.1
S151	H4	Inland	LEI	AT29926	-	2008	SAMN54692149
KF854463.1	H5	Inland	VEG	AT30041	VEG18	GenBank	KF854463.1
KF854462.1	H5	Inland	VEG	AT30040	VEG17	GenBank	KF854462.1	S167 H7
KF854425.1	H5	Inland	LEB	AT29906	LEB2	GenBank	KF854425.1
KF854431.1	H6	Inland	LEB	AT29913	LEB9	GenBank	KF854431.1
KF854471.1	H7	Inland	VEG	AT30055	VE30	GenBank	KF854471.1
KF854470.1	H7	Inland	VEG	AT30036	VE12	GenBank	KF854470.1
KF854469.1	H7	Inland	VEG	AT30034	VE10	GenBank	KF854469.1
KF854468.1	H7	Inland	VEG	AT30032	VE8	GenBank	KF854468.1
KF854467.1	H7	Inland	VEG	AT30031	VE7	GenBank	KF854467.1
KF854466.1	H7	Inland	VEG	AT30029	VE5	GenBank	KF854466.1	S166 H7
KF854465.1	H7	Inland	VEG	AT30026	VE2	GenBank	KF854465.1
KF854464.1	H7	Inland	VEG	AT30050	VE26	GenBank	KF854464.1
KF854436.1	H7	Inland	LEB	AT29916	LEB12	GenBank	KF854436.1	S147 H7
KF854435.1	H7	Inland	LEB	AT29918	LEB14	GenBank	KF854435.1
KF854434.1	H7	Inland	LEB	AT29917	LEB13	GenBank	KF854434.1	S148 H7
KF854433.1	H7	Inland	LEB	AT29915	LEB11	GenBank	KF854433.1
KF854432.1	H7	Inland	LEB	AT29914	LEB10	GenBank	KF854432.1
KF854429.1	H7	Inland	LEB	AT29910	LEB6	GenBank	KF854429.1
KF854428.1	H7	Inland	LEB	AT29909	LEB5	GenBank	KF854428.1
KF854427.1	H7	Inland	LEB	AT29908	LEB4	GenBank	KF854427.1
KF854426.1	H7	Inland	LEB	AT29907	LEB3	GenBank	KF854426.1
KF854423.1	H7	Inland	LEI	AT29929	LEI25	GenBank	KF854423.1
KF854422.1	H7	Inland	LEI	AT29927	LEI23	GenBank	KF854422.1
KF854421.1	H7	Inland	LEI	AT29922	LEI20	GenBank	KF854421.1
KF854420.1	H7	Inland	LEI	AT29921	LEI19	GenBank	KF854420.1	S150 H7
KF854419.1	H7	Inland	LEI	AT29919	LEI17	GenBank	KF854419.1
KF854418.1	H7	Inland	LEI	AT29918	LEI16	GenBank	KF854418.1	S149 H7
S147	H7	Inland	LEB	AT29916	-	2008	SAMN54692145	KF854436.1 H7
S148	H7	Inland	LEB	AT29917	-	2008	SAMN54692146	KF854434.1 H7
S149	H7	Inland	LEB	AT29918	-	2008	SAMN54692147	KF854418.1 H7
S150	H7	Inland	LEI	AT29921	-	2008	SAMN54692148	KF854420.1 H7
S152	H7	Inland	LEI	AT29931	-	2008	SAMN54692150
S165	H7	Inland	VEG	AT30028	-	2008	SAMN54692161
S166	H7	Inland	VEG	AT30029	-	2008	SAMN54692162	KF854466.1 H7
S167	H7	Inland	VEG	AT30040	-	2008	SAMN54692163	KF854462.1 H5
S186	H7	Inland	LEB	AT30198	-	2022	SAMN54692181
S187	H7	Inland	LEB	AT30205	-	2022	SAMN54692182
S188	H7	Inland	LEB	AT30210	-	2022	SAMN54692183
S189	H7	Inland	MON	AT30228	-	2022	SAMN54692184
S190	H7	Inland	MON	AT30229	-	2022	SAMN54692185
KF854385.1	H7	Doñana coastal	COC	AT30101	COC17	GenBank	KF854385.1	S172 H7
KF854382.1	H7	Doñana coastal	COC	AT30095	COC11	GenBank	KF854382.1	S171 H7
KF854360.1	H7	Doñana coastal	DON	AT30156	ACC11	GenBank	KF854360.1
S171	H7	Doñana coastal	COC	AT30095	-	2008	SAMN54692167	KF854382.1 H7
S172	H7	Doñana coastal	COC	AT30101	-	2008	SAMN54692168	KF854385.1 H7
S173	H7	Doñana coastal	COC	AT30112	-	2008	SAMN54692169
KF854358.1	H8	Doñana coastal	DON	AT30153	ACC8	GenBank	KF854358.1
KF854356.1	H8	Doñana coastal	DON	AT30150	ACC5	GenBank	KF854356.1
KF854355.1	H8	Doñana coastal	DON	AT30148	ACC3	GenBank	KF854355.1
KF854357.1	H9	Doñana coastal	DON	AT30152	ACC7	GenBank	KF854357.1
KF854341.1	H10	Doñana coastal	DON	AT30154	ACC9	GenBank	KF854341.1
KF854376.1	H11	Doñana coastal	DON	AT30142	ACO7	GenBank	KF854376.1
KF854362.1	H12	Doñana coastal	DON	AT30161	ACC16	GenBank	KF854362.1
KF854379.1	H13	Doñana coastal	DON	AT30139	ACO4	GenBank	KF854379.1
KF854342.1	H14	Doñana coastal	DON	AT30163	ACC18	GenBank	KF854342.1
KF854347.1	H15	Doñana coastal	DON	AT30126	ACB1	GenBank	KF854347.1
KF854354.1	H16	Doñana coastal	DON	AT30134	ACB9	GenBank	KF854354.1	S179 H17
KF854477.1	H17	Doñana coastal	DON	AT29977	SAi13	GenBank	KF854477.1
KF854476.1	H17	Doñana coastal	DON	AT29967	SAb3	GenBank	KF854476.1
KF854384.1	H17	Doñana coastal	COC	AT30100	COC16	GenBank	KF854384.1
KF854380.1	H17	Doñana coastal	COC	AT30090	COC6	GenBank	KF854380.1
KF854374.1	H17	Doñana coastal	DON	AT30140	ACO5	GenBank	KF854374.1
KF854373.1	H17	Doñana coastal	DON	AT30138	ACO3	GenBank	KF854373.1
KF854361.1	H17	Doñana coastal	DON	AT30160	ACC15	GenBank	KF854361.1
KF854353.1	H17	Doñana coastal	DON	AT30133	ACB8	GenBank	KF854353.1	S178 H17
KF854352.1	H17	Doñana coastal	DON	AT30132	ACB7	GenBank	KF854352.1
S159	H17	Doñana coastal	SAL	AT29975	-	2008	SAMN54692155
S160	H17	Doñana coastal	SAL	AT29990	-	2008	SAMN54692156
S161	H17	Doñana coastal	SAL	AT29993	-	2008	SAMN54692157
S178	H17	Doñana coastal	DON	AT30133	-	2008	SAMN54692173	KF854353.1 H17
S179	H17	Doñana coastal	DON	AT30134	-	2022	SAMN54692174	KF854354.1 H16
KF854363.1	H18	Doñana coastal	DON	AT30164	ACC19	GenBank	KF854363.1
KF854359.1	H19	Doñana coastal	DON	AT30155	ACC10	GenBank	KF854359.1
KF854351.1	H19	Doñana coastal	DON	AT30131	ACB6	GenBank	KF854351.1
KF854390.1	H20	Doñana coastal	COC	AT30087	COC3	GenBank	KF854390.1
KF854383.1	H20	Doñana coastal	COC	AT30097	COC13	GenBank	KF854383.1
KF854377.1	H20	Doñana coastal	DON	AT30143	ACO8	GenBank	KF854377.1
KF854375.1	H20	Doñana coastal	DON	AT30141	ACO6	GenBank	KF854375.1
KF854372.1	H20	Doñana coastal	DON	AT30176	ACO1	GenBank	KF854372.1
KF854349.1	H20	Doñana coastal	DON	AT30129	ACB4	GenBank	KF854349.1
KF854348.1	H20	Doñana coastal	DON	AT30127	ACB2	GenBank	KF854348.1
S195	H20	Doñana coastal	DON	AT30286	-	2022	SAMN54692190
S197	H20	Doñana coastal	DON	AT30293	-	2022	SAMN54692191
KF854350.1	H21	Doñana coastal	DON	AT30130	ACB5	GenBank	KF854350.1
KF854378.1	H22	Doñana coastal	DON	AT30143	ACO8	GenBank	KF854378.1
KF854344.1	H23	Iro-Conil system	COPA	AT30115	COPA1	GenBank	KF854344.1
KF854396.1	H24	Iro-Conil system	COPA	AT30121	COPA7	GenBank	KF854396.1
KF854394.1	H24	Iro-Conil system	COPA	AT30116	COPA2	GenBank	KF854394.1
KF854416.1	H25	Iro-Conil system	ROM	AT30084	ROM29	GenBank	KF854416.1
KF854406.1	H25	Iro-Conil system	IRO	AT30022	IRO28	GenBank	KF854406.1
KF854400.1	H25	Iro-Conil system	COPA	AT30120	COPA6	GenBank	KF854400.1	S175 H25
KF854395.1	H25	Iro-Conil system	COPA	AT30123	COPA9	GenBank	KF854395.1
S162	H25	Iro-Conil system	IRO	AT30004	-	2008	SAMN54692158
S163	H25	Iro-Conil system	IRO	AT30018	-	2008	SAMN54692159	KF854402.1 H27
S168	H25	Iro-Conil system	ROM	AT30077	-	2008	SAMN54692164
S169	H25	Iro-Conil system	ROM	AT30078	-	2008	SAMN54692165
S174	H25	Iro-Conil system	COPA	AT30118	-	2008	SAMN54692170
S175	H25	Iro-Conil system	COPA	AT30120	-	2008	SAMN54692171	KF854400.1 H25
S176	H25	Iro-Conil system	COPA	AT30122	-	2008	SAMN54692172
S180	H25	Iro-Conil system	COPA	AT30182	-	2022	SAMN54692175
S181	H25	Iro-Conil system	COPA	AT30184	-	2022	SAMN54692176
S182	H25	Iro-Conil system	COPA	AT30187	-	2022	SAMN54692177
S194	H25	Iro-Conil system	IRO	AT30276	-	2022	SAMN54692189
KF854343.1	H26	Iro-Conil system	COPA	AT30124	COPA10	GenBank	KF854343.1
KF854402.1	H27	Iro-Conil system	IRO	AT30018	IRO24	GenBank	KF854402.1	S163 H25
KF854346.1	H28	Iro-Conil system	IRO	AT30019	IRO25	GenBank	KF854346.1
S164	H29	Iro-Conil system	IRO	AT30020	-	2008	SAMN54692160	KF854403.1 H30
KF854403.1	H30	Iro-Conil system	IRO	AT30020	IRO26	GenBank	KF854403.1	S164 H29
KF854345.1	H31	Iro-Conil system	IRO	AT30016	IRO22	GenBank	KF854345.1
KF854411.1	H32	Iro-Conil system	ROM	AT30062	ROM8	GenBank	KF854411.1
KF854405.1	H32	Iro-Conil system	IRO	AT30024	IRO30	GenBank	KF854405.1
S170	H32	Iro-Conil system	ROM	AT30063	-	2008	SAMN54692166
S192	H32	Iro-Conil system	IRO	AT30269	-	2022	SAMN54692187
S193	H32	Iro-Conil system	IRO	AT30271	-	2022	SAMN54692188
KF854455.1	H33	Guadalete drainage	PEZ	AT29944	PEZ10	GenBank	KF854455.1
KF854461.1	H34	Guadalete drainage	PEZ	AT29951	PEZ17	GenBank	KF854461.1
KF854460.1	H34	Guadalete drainage	PEZ	AT29950	PEZ16	GenBank	KF854460.1
KF854459.1	H34	Guadalete drainage	PEZ	AT29949	PEZ15	GenBank	KF854459.1
KF854458.1	H34	Guadalete drainage	PEZ	AT29948	PEZ14	GenBank	KF854458.1	S155 H34
KF854457.1	H34	Guadalete drainage	PEZ	AT29947	PEZ13	GenBank	KF854457.1
KF854456.1	H34	Guadalete drainage	PEZ	AT29945	PEZ11	GenBank	KF854456.1
KF854454.1	H34	Guadalete drainage	PEZ	AT29940	PEZ6	GenBank	KF854454.1	S154 H34
KF854453.1	H34	Guadalete drainage	PEZ	AT29941	PEZ7	GenBank	KF854453.1
KF854449.1	H34	Guadalete drainage	PEZ	AT29936	PEZ2	GenBank	KF854449.1	S153 H1
KF854447.1	H34	Guadalete drainage	PED	AT29962	PED28	GenBank	KF854447.1
KF854446.1	H34	Guadalete drainage	PED	AT29960	PED26	GenBank	KF854446.1
KF854444.1	H34	Guadalete drainage	PED	AT29955	PED21	GenBank	KF854444.1	S156 H34
KF854443.1	H34	Guadalete drainage	PED	AT29953	PED19	GenBank	KF854443.1
KF854442.1	H34	Guadalete drainage	PED	AT29952	PED18	GenBank	KF854442.1
S154	H34	Guadalete drainage	PEZ	AT29940	-	2008	SAMN54692152	KF854454.1 H34
S155	H34	Guadalete drainage	PEZ	AT29948	-	2008	SAMN54692153	KF854458.1 H34
S156	H34	Guadalete drainage	PED	AT29955	-	2008	SAMN54692154	KF854444.1 H34
S183	H34	Guadalete drainage	PED	AT30188	-	2022	SAMN54692178
S184	H34	Guadalete drainage	PED	AT30190	-	2022	SAMN54692179
S185	H34	Guadalete drainage	PED	AT30191	-	2022	SAMN54692180
